# Supplementary material for: Assessing the Added Value of Sentinel-1 PolSAR Data for Crop Classification
Source: MDPI journal article supplement (doi:10.3390/rs14225739), 2022-11-13
Supplement: s1 [file s1]

# Assessing the added value of Sentinel-1 PolSAR data for crop classification (Supplementary Material)

Maria Ioannidou <sup>1,†</sup>, Alkiviadis Koukos <sup>1,†,\*</sup> , Vasileios Sitokonstantinou <sup>1</sup> , Ioannis Papoutsis <sup>2</sup> and Charalampos Kontoes <sup>1</sup>

<sup>1</sup> BEYOND Center, IAASARS, National Observatory of Athens, Penteli, Greece;

<sup>2</sup> Orion Lab, IAASARS, National Observatory of Athens, Penteli, Greece;

\* Correspondence: akoukos@noa.gr A.K

† These authors contributed equally to this work.

**Table S1.** Information about Sentinel-1 and Sentinel-2 images

| Mission    | Feature type                                | #features | #acquisitions | #total features      |
|------------|---------------------------------------------|-----------|---------------|----------------------|
| Sentinel 1 | H/A/ $\bar{\alpha}$ polarimetric parameters | 23        | 24            | $23 \times 24 = 552$ |
| Sentinel 2 | Multispectral bands (Reflectance values)    | 10        | 19            | $10 \times 19 = 190$ |
|            | Vegetation Indices                          | 4         |               | $4 \times 19 = 76$   |
| Total      |                                             |           |               | 818                  |

**Table S2.** GA's parametrization.

| Parameter                                                 | Value |
|-----------------------------------------------------------|-------|
| Population Size                                           | 100   |
| Elitism ratio                                             | 0.2   |
| Crossover probability                                     | 0.9   |
| Mutation probability (chromosome level)                   | 0.1   |
| Mutation probability (gene level)                         | 0.01  |
| Maximum number of iterations                              | 100   |
| Maximum successive generations for improved fitness value | 5     |

**Table S3.** SVM parametrization for each classification scenario.

| Classification scenario | #features | $C$  | $coef_0$ | $gamma$ |
|-------------------------|-----------|------|----------|---------|
| Sentinel-1              | 552       | 4    | 1        | 0.001   |
| Sentinel-1/2            | 818       | 1    | 1        | 0.001   |
| $t = 20$                | 23        | 0.25 | 1        | 0.1     |
| $t = 15$                | 71        | 128  | 0.1      | 0.001   |
| $t = 12$                | 125       | 0.25 | 10       | 0.01    |
| $t = 10$                | 35        | 0.25 | 10       | 0.005   |

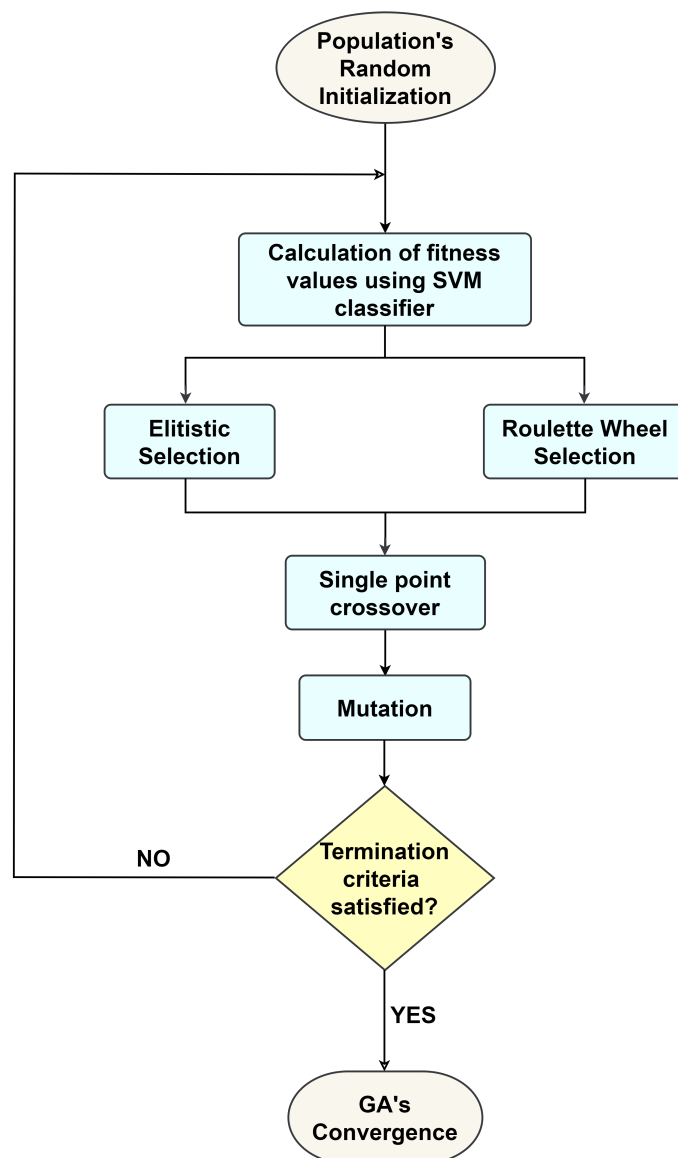

**Figure S1.** Flowchart of genetic algorithm's implementation

**Table S4.** SVM classification report using as input only the Sentinel-2 features

| Crop Type    | UA    | PA    | f1-score | support |
|--------------|-------|-------|----------|---------|
| soft wheat   | 92.87 | 94.82 | 93.84    | 3823    |
| maize        | 95.68 | 94.36 | 94.99    | 156     |
| barley       | 92.51 | 92.48 | 92.50    | 2526    |
| oats         | 91.86 | 87.51 | 89.63    | 820     |
| sunflower    | 95.72 | 92.30 | 93.97    | 200     |
| rapeseed     | 94.32 | 91.98 | 93.13    | 496     |
| broad beans  | 92.66 | 87.35 | 89.91    | 147     |
| shrub grass  | 84.19 | 79.08 | 81.51    | 228     |
| vineyards    | 83.71 | 88.08 | 85.74    | 146     |
| cherry trees | 87.10 | 81.57 | 84.09    | 89      |
| macro avg    | 91.06 | 88.95 | 89.93    | 8631    |
| weighted avg | 92.42 | 92.42 | 92.40    | 8631    |

**Table S5.** SVM classification report using as input all the available features

| Crop Type    | UA    | PA    | f1-score | support |
|--------------|-------|-------|----------|---------|
| soft wheat   | 92.17 | 95.02 | 93.57    | 3823    |
| maize        | 96.22 | 95.96 | 96.08    | 156     |
| barley       | 92.81 | 92.88 | 92.85    | 2526    |
| oats         | 92.33 | 84.56 | 88.27    | 820     |
| sunflower    | 97.30 | 91.60 | 94.36    | 200     |
| rapeseed     | 96.20 | 92.82 | 94.48    | 496     |
| broad beans  | 94.50 | 85.58 | 89.79    | 147     |
| shrub grass  | 81.67 | 78.46 | 79.98    | 228     |
| vineyards    | 80.03 | 86.16 | 82.93    | 146     |
| cherry trees | 87.64 | 76.85 | 81.81    | 89      |
| macro avg    | 91.09 | 87.99 | 89.41    | 8631    |
| weighted avg | 92.31 | 92.28 | 92.25    | 8631    |

**Table S6.** SVM classification report using as input only the Sentinel-1 features

| Crop Type    | UA    | PA    | f1-score | support |
|--------------|-------|-------|----------|---------|
| soft wheat   | 81.99 | 90.66 | 86.11    | 3823    |
| maize        | 92.85 | 88.59 | 90.65    | 156     |
| barley       | 87.82 | 86.81 | 87.31    | 2526    |
| oats         | 77.49 | 60.39 | 67.87    | 820     |
| sunflower    | 91.99 | 84.60 | 88.10    | 200     |
| rapeseed     | 87.63 | 85.18 | 86.37    | 496     |
| broad beans  | 68.99 | 48.44 | 56.85    | 147     |
| shrub grass  | 51.68 | 32.68 | 39.90    | 228     |
| vineyards    | 57.30 | 54.11 | 55.50    | 146     |
| cherry trees | 63.25 | 45.39 | 52.50    | 89      |
| macro avg    | 76.10 | 67.68 | 71.12    | 8631    |
| weighted avg | 82.39 | 82.83 | 82.29    | 8631    |

**Table S7.** SVM classification report using as input the optimal 80-feature subset derived from a single genetic algorithm implementation.

| Crop Type    | UA    | PA    | f1-score | support |
|--------------|-------|-------|----------|---------|
| soft wheat   | 94.09 | 95.80 | 94.94    | 3823    |
| maize        | 95.23 | 95.26 | 95.23    | 156     |
| barley       | 93.95 | 93.92 | 93.93    | 2526    |
| oats         | 93.62 | 88.70 | 91.09    | 820     |
| sunflower    | 97.09 | 91.45 | 94.18    | 200     |
| rapeseed     | 95.65 | 94.72 | 95.18    | 496     |
| broad beans  | 94.91 | 88.37 | 91.51    | 147     |
| shrub grass  | 83.75 | 81.97 | 82.84    | 228     |
| vineyards    | 80.61 | 87.74 | 83.97    | 146     |
| cherry trees | 86.90 | 79.66 | 83.04    | 89      |
| macro avg    | 91.58 | 89.76 | 90.59    | 8631    |
| weighted avg | 93.62 | 93.60 | 93.59    | 8631    |

**Table S8.** Most important features with the relevant numbers of occurrences (c) among the 100 different feature sets acquired from the 100 different GA runs, for the scenario with no artificial clouds

| Feature                    | t  | Feature                      | t  | Feature                      | t  |
|----------------------------|----|------------------------------|----|------------------------------|----|
| Jul08_PSRI                 | 90 | Oct21_NDVI                   | 21 | Sep11_NDVI                   | 16 |
| Jul23_PSRI                 | 82 | Jan29_B03                    | 21 | Jan12_entropy_shannon_norm   | 16 |
| Jun23_PSRI                 | 82 | Sep11_NDWI                   | 20 | Jul29_entropy_shannon_I      | 16 |
| Jul08_NDWI                 | 79 | Jun23_entropy_shannon_I      | 20 | Mar31_I2                     | 16 |
| Apr24_PSRI                 | 69 | May30_I2                     | 20 | Jun23_entropy_shannon_norm   | 16 |
| Jul08_B08                  | 56 | Mar30_B05                    | 20 | Sep11_SAVI                   | 16 |
| Apr24_B06                  | 56 | Apr19_B8A                    | 20 | Oct16_B02                    | 16 |
| Jul08_SAVI                 | 49 | Aug27_PSRI                   | 20 | Jul23_B03                    | 15 |
| Apr24_B05                  | 47 | Jul23_B12                    | 19 | May30_entropy_shannon_I      | 15 |
| Apr24_B08                  | 45 | May06_entropy_shannon_I_norm | 19 | Apr19_SAVI                   | 15 |
| Apr19_B06                  | 43 | Oct16_B8A                    | 19 | Mar30_B06                    | 15 |
| Jun23_NDWI                 | 40 | Jun11_entropy_shannon_norm   | 19 | Apr12_combination_HA         | 15 |
| Jul08_B8A                  | 40 | Jul08_B12                    | 19 | May06_entropy_shannon        | 15 |
| Jul08_B02                  | 37 | Jul08_B04                    | 19 | Apr19_NDVI                   | 15 |
| Jun23_B05                  | 37 | Aug27_B05                    | 19 | Jul17_entropy_shannon_I_norm | 15 |
| Apr24_B8A                  | 36 | Jun03_SAVI                   | 19 | Jan29_NDWI                   | 15 |
| Aug02_PSRI                 | 35 | May18_entropy_shannon        | 18 | Oct21_B02                    | 15 |
| Oct16_SAVI                 | 35 | Oct21_B12                    | 18 | Apr24_B04                    | 15 |
| Jul08_B11                  | 34 | Aug02_NDWI                   | 18 | Apr12_combination_H1mA       | 15 |
| Apr24_B07                  | 33 | Jun11_entropy_shannon        | 18 | Jul23_NDVI                   | 15 |
| Jul08_NDVI                 | 32 | Jun11_I1                     | 18 | Feb05_combination_H1mA       | 15 |
| Apr24_B03                  | 32 | Apr19_B03                    | 18 | Jul23_SAVI                   | 15 |
| Apr19_PSRI                 | 31 | Jul23_B05                    | 18 | Jan12_entropy_shannon_I      | 14 |
| Sep16_PSRI                 | 30 | Aug27_B06                    | 18 | Jan24_NDVI                   | 14 |
| Oct21_B8A                  | 29 | Apr24_NDWI                   | 18 | May19_B12                    | 14 |
| Jun23_B11                  | 29 | Aug27_B02                    | 18 | Jan29_B05                    | 14 |
| Jul23_B02                  | 28 | May30_entropy_shannon_I_norm | 18 | Jul05_entropy_shannon        | 14 |
| Oct16_NDVI                 | 27 | Oct21_B08                    | 18 | May04_NDWI                   | 14 |
| Jun23_NDVI                 | 27 | May04_SAVI                   | 18 | Jun23_I2                     | 14 |
| Oct16_PSRI                 | 27 | Oct16_B03                    | 18 | Jul05_combination_1mHA       | 14 |
| Apr24_B11                  | 26 | Aug27_B8A                    | 17 | Apr24_entropy_shannon_norm   | 14 |
| May30_entropy_shannon_norm | 25 | Mar30_NDVI                   | 17 | Mar15_PSRI                   | 14 |
| Jul23_B8A                  | 25 | Jun03_B06                    | 17 | Oct16_B08                    | 14 |
| Jun03_NDWI                 | 25 | Jun03_PSRI                   | 17 | Jan24_anisotropy             | 14 |
| May30_entropy_shannon      | 25 | Jan29_B06                    | 17 | Jun23_combination_1mH1mA     | 14 |
| May19_NDWI                 | 24 | Sep15_entropy_shannon_I_norm | 17 | Jul05_p2                     | 14 |
| Oct21_PSRI                 | 24 | Oct16_B04                    | 17 | May24_SAVI                   | 14 |
| Apr24_B02                  | 24 | Jun23_B06                    | 17 | Oct21_NDWI                   | 14 |
| Jan29_B02                  | 23 | Jun23_B04                    | 17 | Mar31_anisotropy             | 13 |
| Jul08_B05                  | 23 | Aug27_NDWI                   | 17 | May30_I1                     | 13 |
| May19_PSRI                 | 23 | Apr19_B12                    | 17 | Jan29_B11                    | 13 |
| Apr24_NDVI                 | 23 | Jun03_B07                    | 17 | Jul17_I1                     | 13 |
| Apr19_B05                  | 22 | Jun03_B12                    | 17 | Jan29_B07                    | 13 |
| Aug02_B02                  | 22 | Aug27_B11                    | 17 | Jul29_entropy_shannon        | 13 |
| Jun23_SAVI                 | 22 | May06_entropy_shannon_norm   | 16 | Aug10_entropy_shannon_I      | 13 |
| Apr24_SAVI                 | 22 | Jun11_I2                     | 16 | Aug27_B12                    | 13 |
| Jul23_B08                  | 22 | Oct16_B12                    | 16 | Sep11_B12                    | 13 |
| Jul08_B03                  | 21 | Jan12_I1                     | 16 | Jul05_delta2                 | 13 |
| May19_SAVI                 | 21 | Aug27_B08                    | 16 | Mar30_B11                    | 13 |
| Jun23_B07                  | 21 | Jan24_NDWI                   | 16 | Jul23_B11                    | 13 |
| May19_NDVI                 | 21 | Jun23_I1                     | 16 | Jun03_NDVI                   | 13 |
| Aug02_B03                  | 21 | May06_entropy_shannon_I      | 16 | Jan12_alpha                  | 13 |

**Table S8.** Most important features with the relevant numbers of occurrences (c) among the 100 different feature sets acquired from the 100 different GA runs, for the scenario with no artificial clouds (continued)

| Feature                      | t  | Feature                      | t  | Feature                      | t  |
|------------------------------|----|------------------------------|----|------------------------------|----|
| Sep27_entropy_shannon_norm   | 13 | Mar30_B03                    | 11 | Sep16_B02                    | 10 |
| Mar31_alpha                  | 13 | Mar31_entropy_shannon_I      | 11 | Jul05_anisotropy             | 10 |
| May24_NDWI                   | 13 | Aug10_entropy_shannon_norm   | 11 | May30_lambda                 | 10 |
| May18_entropy_shannon_I      | 13 | Jun23_entropy_shannon_I_norm | 11 | Apr24_B12                    | 10 |
| Jan29_SAVI                   | 13 | Jun23_combination_H1mA       | 11 | May18_entropy_shannon_norm   | 10 |
| Mar31_combination_1mH1mA     | 13 | Apr19_B04                    | 11 | Mar15_B07                    | 10 |
| May18_lambda                 | 13 | May06_alpha                  | 11 | Apr24_entropy_shannon_I_norm | 10 |
| Jul17_entropy_shannon_norm   | 13 | May18_I1                     | 11 | Mar31_p2                     | 10 |
| Jul08_B07                    | 13 | Apr19_B07                    | 11 | Jan24_alpha1                 | 10 |
| Aug22_entropy_shannon_I_norm | 13 | Mar15_B12                    | 11 | Aug02_B08                    | 10 |
| Jun03_B04                    | 13 | Mar31_I1                     | 11 | Feb05_entropy_shannon_I      | 10 |
| May24_PSRI                   | 13 | May30_entropy_shannon_P      | 11 | May18_p1                     | 10 |
| Mar30_B07                    | 13 | Mar31_alpha2                 | 11 | Sep03_I2                     | 10 |
| May06_entropy_shannon_P_norm | 13 | Mar31_lambda                 | 11 | Feb17_alpha2                 | 10 |
| Jan29_B12                    | 13 | Jun23_p1                     | 11 | Jan24_B11                    | 10 |
| Jul05_I2                     | 13 | Feb05_entropy_shannon_norm   | 11 | Sep03_entropy_shannon_I_norm | 10 |
| Jul05_combination_1mH1mA     | 13 | Sep27_p1                     | 11 | May18_alpha                  | 10 |
| Mar30_B02                    | 12 | Sep16_B03                    | 11 | Mar13_entropy_shannon_norm   | 10 |
| Jul23_NDWI                   | 12 | Mar30_B8A                    | 11 | Sep27_entropy_shannon_P      | 10 |
| Apr19_B08                    | 12 | Aug02_B11                    | 11 | Apr12_delta                  | 10 |
| Oct16_B05                    | 12 | Jun03_B11                    | 11 | Apr12_I1                     | 10 |
| Aug02_NDVI                   | 12 | May30_entropy                | 11 | May04_B08                    | 10 |
| Oct21_B04                    | 12 | Sep11_B8A                    | 11 | Mar01_lambda                 | 10 |
| Sep03_delta1                 | 12 | Jun23_alpha                  | 11 | Aug10_entropy_shannon_I_norm | 10 |
| Aug27_SAVI                   | 12 | Jun23_B08                    | 11 | Feb17_entropy_shannon_I_norm | 10 |
| Jul29_entropy_shannon_norm   | 12 | Jul05_p1                     | 11 | Sep03_alpha                  | 10 |
| Oct21_SAVI                   | 12 | Aug02_B06                    | 11 | Jul17_I2                     | 10 |
| Jun23_entropy_shannon_P_norm | 12 | Sep16_B8A                    | 11 | Sep03_anisotropy             | 10 |
| Jan12_I2                     | 12 | Jan12_entropy_shannon_I_norm | 11 | Oct09_entropy_shannon_norm   | 10 |
| Aug02_SAVI                   | 12 | Mar01_entropy_shannon_norm   | 11 | Sep16_SAVI                   | 10 |
| Mar15_B05                    | 12 | Aug22_entropy_shannon        | 11 | Jul17_entropy_shannon_I      | 10 |
| May18_entropy_shannon_I_norm | 12 | Oct21_I2                     | 11 | Mar31_entropy_shannon_P_norm | 10 |
| Sep03_combination_1mHA       | 12 | Mar13_entropy_shannon_P_norm | 11 | Sep16_B08                    | 10 |
| Jun11_lambda                 | 12 | Jul08_B06                    | 11 | Jul05_entropy                | 10 |
| Sep16_NDWI                   | 12 | May30_combination_1mHA       | 11 | Sep03_entropy_shannon        | 10 |
| Mar30_B04                    | 12 | Mar31_entropy_shannon_P      | 11 | Jun23_entropy_shannon        | 10 |
| Jun23_p2                     | 12 | Aug02_B04                    | 11 | Jun03_B05                    | 10 |
| Jun11_entropy_shannon_I_norm | 12 | Jul29_I2                     | 11 | May30_p2                     | 10 |
| Oct21_B07                    | 12 | Sep11_B05                    | 11 | May24_NDVI                   | 10 |
| Jun23_B12                    | 12 | Mar13_entropy_shannon        | 11 | Jul05_I1                     | 10 |
| Mar01_I2                     | 12 | Apr12_entropy_shannon_I      | 11 | Jan29_B04                    | 10 |
| Mar15_B06                    | 12 | Jun11_entropy_shannon_I      | 11 | Mar01_entropy_shannon_P      | 10 |
| Jun23_combination_HA         | 12 | Oct21_B11                    | 11 | Jan12_entropy_shannon        | 10 |
| Jun23_B03                    | 12 | Oct09_entropy_shannon        | 11 | Jan12_combination_H1mA       | 10 |
| May06_I2                     | 12 | Mar31_entropy_shannon_I_norm | 11 | Sep11_B04                    | 10 |
| Mar15_NDVI                   | 12 | Jul23_B04                    | 11 | May19_B05                    | 10 |
| Oct16_B06                    | 12 | Jan24_combination_1mHA       | 11 | Feb05_I2                     | 10 |
| Jul29_I1                     | 12 | May18_entropy_shannon_P      | 11 | Jul23_B06                    | 10 |
| May18_I2                     | 12 | Mar30_B12                    | 11 | May04_B12                    | 10 |
| Feb05_delta                  | 12 | May04_NDVI                   | 10 | Aug02_B12                    | 10 |
| Jul23_B07                    | 12 | Jan12_entropy_shannon_P_norm | 10 | Jul05_lambda                 | 10 |
| Aug27_B04                    | 11 | Feb05_p2                     | 10 |                              |    |

**Table S9.** Most important features with the relevant numbers of occurrences (c) among the 100 different feature sets acquired from the 100 different GA runs, for the scenario with artificial clouds

| Feature                    | t  | Feature                      | t  | Feature                      | t  |
|----------------------------|----|------------------------------|----|------------------------------|----|
| Jul08_PSRI                 | 90 | Oct21_NDVI                   | 21 | Sep11_NDVI                   | 16 |
| Jul23_PSRI                 | 82 | Jan29_B03                    | 21 | Jan12_entropy_shannon_norm   | 16 |
| Jun23_PSRI                 | 82 | Sep11_NDWI                   | 20 | Jul29_entropy_shannon_I      | 16 |
| Jul08_NDWI                 | 79 | Jun23_entropy_shannon_I      | 20 | Mar31_I2                     | 16 |
| Apr24_PSRI                 | 69 | May30_I2                     | 20 | Jun23_entropy_shannon_norm   | 16 |
| Jul08_B08                  | 56 | Mar30_B05                    | 20 | Sep11_SAVI                   | 16 |
| Apr24_B06                  | 56 | Apr19_B8A                    | 20 | Oct16_B02                    | 16 |
| Jul08_SAVI                 | 49 | Aug27_PSRI                   | 20 | Jul23_B03                    | 15 |
| Apr24_B05                  | 47 | Jul23_B12                    | 19 | May30_entropy_shannon_I      | 15 |
| Apr24_B08                  | 45 | May06_entropy_shannon_I_norm | 19 | Apr19_SAVI                   | 15 |
| Apr19_B06                  | 43 | Oct16_B8A                    | 19 | Mar30_B06                    | 15 |
| Jun23_NDWI                 | 40 | Jun11_entropy_shannon_norm   | 19 | Apr12_combination_HA         | 15 |
| Jul08_B8A                  | 40 | Jul08_B12                    | 19 | May06_entropy_shannon        | 15 |
| Jul08_B02                  | 37 | Jul08_B04                    | 19 | Apr19_NDVI                   | 15 |
| Jun23_B05                  | 37 | Aug27_B05                    | 19 | Jul17_entropy_shannon_I_norm | 15 |
| Apr24_B8A                  | 36 | Jun03_SAVI                   | 19 | Jan29_NDWI                   | 15 |
| Aug02_PSRI                 | 35 | May18_entropy_shannon        | 18 | Oct21_B02                    | 15 |
| Oct16_SAVI                 | 35 | Oct21_B12                    | 18 | Apr24_B04                    | 15 |
| Jul08_B11                  | 34 | Aug02_NDWI                   | 18 | Apr12_combination_H1mA       | 15 |
| Apr24_B07                  | 33 | Jun11_entropy_shannon        | 18 | Jul23_NDVI                   | 15 |
| Jul08_NDVI                 | 32 | Jun11_I1                     | 18 | Feb05_combination_H1mA       | 15 |
| Apr24_B03                  | 32 | Apr19_B03                    | 18 | Jul23_SAVI                   | 15 |
| Apr19_PSRI                 | 31 | Jul23_B05                    | 18 | Jan12_entropy_shannon_I      | 14 |
| Sep16_PSRI                 | 30 | Aug27_B06                    | 18 | Jan24_NDVI                   | 14 |
| Oct21_B8A                  | 29 | Apr24_NDWI                   | 18 | May19_B12                    | 14 |
| Jun23_B11                  | 29 | Aug27_B02                    | 18 | Jan29_B05                    | 14 |
| Jul23_B02                  | 28 | May30_entropy_shannon_I_norm | 18 | Jul05_entropy_shannon        | 14 |
| Oct16_NDVI                 | 27 | Oct21_B08                    | 18 | May04_NDWI                   | 14 |
| Jun23_NDVI                 | 27 | May04_SAVI                   | 18 | Jun23_I2                     | 14 |
| Oct16_PSRI                 | 27 | Oct16_B03                    | 18 | Jul05_combination_1mHA       | 14 |
| Apr24_B11                  | 26 | Aug27_B8A                    | 17 | Apr24_entropy_shannon_norm   | 14 |
| May30_entropy_shannon_norm | 25 | Mar30_NDVI                   | 17 | Mar15_PSRI                   | 14 |
| Jul23_B8A                  | 25 | Jun03_B06                    | 17 | Oct16_B08                    | 14 |
| Jun03_NDWI                 | 25 | Jun03_PSRI                   | 17 | Jan24_anisotropy             | 14 |
| May30_entropy_shannon      | 25 | Jan29_B06                    | 17 | Jun23_combination_1mH1mA     | 14 |
| May19_NDWI                 | 24 | Sep15_entropy_shannon_I_norm | 17 | Jul05_p2                     | 14 |
| Oct21_PSRI                 | 24 | Oct16_B04                    | 17 | May24_SAVI                   | 14 |
| Apr24_B02                  | 24 | Jun23_B06                    | 17 | Oct21_NDWI                   | 14 |
| Jan29_B02                  | 23 | Jun23_B04                    | 17 | Mar31_anisotropy             | 13 |
| Jul08_B05                  | 23 | Aug27_NDWI                   | 17 | May30_I1                     | 13 |
| May19_PSRI                 | 23 | Apr19_B12                    | 17 | Jan29_B11                    | 13 |
| Apr24_NDVI                 | 23 | Jun03_B07                    | 17 | Jul17_I1                     | 13 |
| Apr19_B05                  | 22 | Jun03_B12                    | 17 | Jan29_B07                    | 13 |
| Aug02_B02                  | 22 | Aug27_B11                    | 17 | Jul29_entropy_shannon        | 13 |
| Jun23_SAVI                 | 22 | May06_entropy_shannon_norm   | 16 | Aug10_entropy_shannon_I      | 13 |
| Apr24_SAVI                 | 22 | Jun11_I2                     | 16 | Aug27_B12                    | 13 |
| Jul23_B08                  | 22 | Oct16_B12                    | 16 | Sep11_B12                    | 13 |
| Jul08_B03                  | 21 | Jan12_I1                     | 16 | Jul05_delta2                 | 13 |
| May19_SAVI                 | 21 | Aug27_B08                    | 16 | Mar30_B11                    | 13 |
| Jun23_B07                  | 21 | Jan24_NDWI                   | 16 | Jul23_B11                    | 13 |
| May19_NDVI                 | 21 | Jun23_I1                     | 16 | Jun03_NDVI                   | 13 |
| Aug02_B03                  | 21 | May06_entropy_shannon_I      | 16 | Jan12_alpha                  | 13 |

**Table S9.** Most important features with the relevant numbers of occurrences (c) among the 100 different feature sets acquired from the 100 different GA runs, for the scenario with artificial clouds (continued)

| Feature                      | t  | Feature                      | t  | Feature                      | t  |
|------------------------------|----|------------------------------|----|------------------------------|----|
| Sep27_entropy_shannon_norm   | 13 | Mar30_B03                    | 11 | Sep16_B02                    | 10 |
| Mar31_alpha                  | 13 | Mar31_entropy_shannon_I      | 11 | Jul05_anisotropy             | 10 |
| May24_NDWI                   | 13 | Aug10_entropy_shannon_norm   | 11 | May30_lambda                 | 10 |
| May18_entropy_shannon_I      | 13 | Jun23_entropy_shannon_I_norm | 11 | Apr24_B12                    | 10 |
| Jan29_SAVI                   | 13 | Jun23_combination_H1mA       | 11 | May18_entropy_shannon_norm   | 10 |
| Mar31_combination_1mH1mA     | 13 | Apr19_B04                    | 11 | Mar15_B07                    | 10 |
| May18_lambda                 | 13 | May06_alpha                  | 11 | Apr24_entropy_shannon_I_norm | 10 |
| Jul17_entropy_shannon_norm   | 13 | May18_I1                     | 11 | Mar31_p2                     | 10 |
| Jul08_B07                    | 13 | Apr19_B07                    | 11 | Jan24_alpha1                 | 10 |
| Aug22_entropy_shannon_I_norm | 13 | Mar15_B12                    | 11 | Aug02_B08                    | 10 |
| Jun03_B04                    | 13 | Mar31_I1                     | 11 | Feb05_entropy_shannon_I      | 10 |
| May24_PSRI                   | 13 | May30_entropy_shannon_P      | 11 | May18_p1                     | 10 |
| Mar30_B07                    | 13 | Mar31_alpha2                 | 11 | Sep03_I2                     | 10 |
| May06_entropy_shannon_P_norm | 13 | Mar31_lambda                 | 11 | Feb17_alpha2                 | 10 |
| Jan29_B12                    | 13 | Jun23_p1                     | 11 | Jan24_B11                    | 10 |
| Jul05_I2                     | 13 | Feb05_entropy_shannon_norm   | 11 | Sep03_entropy_shannon_I_norm | 10 |
| Jul05_combination_1mH1mA     | 13 | Sep27_p1                     | 11 | May18_alpha                  | 10 |
| Mar30_B02                    | 12 | Sep16_B03                    | 11 | Mar13_entropy_shannon_norm   | 10 |
| Jul23_NDWI                   | 12 | Mar30_B8A                    | 11 | Sep27_entropy_shannon_P      | 10 |
| Apr19_B08                    | 12 | Aug02_B11                    | 11 | Apr12_delta                  | 10 |
| Oct16_B05                    | 12 | Jun03_B11                    | 11 | Apr12_I1                     | 10 |
| Aug02_NDVI                   | 12 | May30_entropy                | 11 | May04_B08                    | 10 |
| Oct21_B04                    | 12 | Sep11_B8A                    | 11 | Mar01_lambda                 | 10 |
| Sep03_delta1                 | 12 | Jun23_alpha                  | 11 | Aug10_entropy_shannon_I_norm | 10 |
| Aug27_SAVI                   | 12 | Jun23_B08                    | 11 | Feb17_entropy_shannon_I_norm | 10 |
| Jul29_entropy_shannon_norm   | 12 | Jul05_p1                     | 11 | Sep03_alpha                  | 10 |
| Oct21_SAVI                   | 12 | Aug02_B06                    | 11 | Jul17_I2                     | 10 |
| Jun23_entropy_shannon_P_norm | 12 | Sep16_B8A                    | 11 | Sep03_anisotropy             | 10 |
| Jan12_I2                     | 12 | Jan12_entropy_shannon_I_norm | 11 | Oct09_entropy_shannon_norm   | 10 |
| Aug02_SAVI                   | 12 | Mar01_entropy_shannon_norm   | 11 | Sep16_SAVI                   | 10 |
| Mar15_B05                    | 12 | Aug22_entropy_shannon        | 11 | Jul17_entropy_shannon_I      | 10 |
| May18_entropy_shannon_I_norm | 12 | Oct21_I2                     | 11 | Mar31_entropy_shannon_P_norm | 10 |
| Sep03_combination_1mHA       | 12 | Mar13_entropy_shannon_P_norm | 11 | Sep16_B08                    | 10 |
| Jun11_lambda                 | 12 | Jul08_B06                    | 11 | Jul05_entropy                | 10 |
| Sep16_NDWI                   | 12 | May30_combination_1mHA       | 11 | Sep03_entropy_shannon        | 10 |
| Mar30_B04                    | 12 | Mar31_entropy_shannon_P      | 11 | Jun23_entropy_shannon        | 10 |
| Jun23_p2                     | 12 | Aug02_B04                    | 11 | Jun03_B05                    | 10 |
| Jun11_entropy_shannon_I_norm | 12 | Jul29_I2                     | 11 | May30_p2                     | 10 |
| Oct21_B07                    | 12 | Sep11_B05                    | 11 | May24_NDVI                   | 10 |
| Jun23_B12                    | 12 | Mar13_entropy_shannon        | 11 | Jul05_I1                     | 10 |
| Mar01_I2                     | 12 | Apr12_entropy_shannon_I      | 11 | Jan29_B04                    | 10 |
| Mar15_B06                    | 12 | Jun11_entropy_shannon_I      | 11 | Mar01_entropy_shannon_P      | 10 |
| Jun23_combination_HA         | 12 | Oct21_B11                    | 11 | Jan12_entropy_shannon        | 10 |
| Jun23_B03                    | 12 | Oct09_entropy_shannon        | 11 | Jan12_combination_H1mA       | 10 |
| May06_I2                     | 12 | Mar31_entropy_shannon_I_norm | 11 | Sep11_B04                    | 10 |
| Mar15_NDVI                   | 12 | Jul23_B04                    | 11 | May19_B05                    | 10 |
| Oct16_B06                    | 12 | Jan24_combination_1mHA       | 11 | Feb05_I2                     | 10 |
| Jul29_I1                     | 12 | May18_entropy_shannon_P      | 11 | Jul23_B06                    | 10 |
| May18_I2                     | 12 | Mar30_B12                    | 11 | May04_B12                    | 10 |
| Feb05_delta                  | 12 | May04_NDVI                   | 10 | Aug02_B12                    | 10 |
| Jul23_B07                    | 12 | Jan12_entropy_shannon_P_norm | 10 | Jul05_lambda                 | 10 |
| Aug27_B04                    | 11 | Feb05_p2                     | 10 |                              |    |
